# Supplementary material
Source: PubMed Central journal article supplement (PMC7840789)

**Chronic liver disease independently  
associated with COVID-19 severity: Evidence  
based on adjusted effect estimates**

**SUPPLEMENTARY FILE**

**Tables & Figures**

Table S1 Subgroup analysis and meta-regression

| Variables       | No. of studies | Meta-regression  |         |         | Subgroup analysis  |         | Heterogeneity  |                |         |
|-----------------|----------------|------------------|---------|---------|--------------------|---------|----------------|----------------|---------|
|                 |                | Tau <sup>2</sup> | t-Value | P value | Pooled ES (95% CI) | P value | I <sup>2</sup> | χ <sup>2</sup> | P value |
| Sample size     |                | 0.128            | 1.37    | 0.182   |                    |         |                |                |         |
| ≥ 1000          | 16             |                  |         |         | 1.36 (1.14-1.64)   | 0.001   | 38.3%          | 24.32          | 0.060   |
| < 1000          | 13             |                  |         |         | 1.73 (1.12-2.68)   | 0.014   | 66.9%          | 36.23          | < 0.001 |
| Age (years)     |                | 0.170            | 0.29    | 0.770   |                    |         |                |                |         |
| ≥ 60            | 18             |                  |         |         | 1.53 (1.23-1.91)   | < 0.001 | 47.3%          | 30.17          | 0.025   |
| < 60            | 11             |                  |         |         | 1.44 (0.88-2.36)   | 0.151   | 86.8%          | 75.58          | < 0.001 |
| Male (%)        |                | 0.167            | 0.10    | 0.918   |                    |         |                |                |         |
| ≥ 55            | 14             |                  |         |         | 1.48 (1.17-1.88)   | 0.001   | 57.4%          | 30.52          | 0.004   |
| < 55            | 15             |                  |         |         | 1.51 (0.99-2.30)   | 0.057   | 78.2%          | 64.30          | < 0.001 |
| Effect estimate |                | 0.162            |         | 0.397   |                    |         |                |                |         |
| HR              | 11             |                  | 0.11    | 0.911   | 1.33 (1.03-1.72)   | 0.030   | 38.2%          | 16.18          | 0.095   |
| OR              | 17             |                  | 0.57    | 0.575   | 1.75 (1.19-2.58)   | 0.005   | 90.7%          | 172.18         | < 0.001 |
| RR              | 1              |                  | -       | -       | 1.19 (0.45-3.17)   | 0.728   | -              | -              | -       |
| Region          |                | 0.177            |         | 0.374   |                    |         |                |                |         |
| Asia            | 14             |                  | 0.44    | 0.660   | 1.28 (0.78-2.12)   | 0.330   | 86.2%          | 93.89          | < 0.001 |
| North America   | 7              |                  | -       | -       | 1.49 (1.18-1.87)   | 0.001   | 0.00%          | 4.43           | 0.619   |
| Europe          | 8              |                  | 0.76    | 0.454   | 1.82 (1.32-2.52)   | < 0.001 | 64.3%          | 19.62          | 0.006   |
| Study design    |                | 0.169            | 0.46    | 0.646   |                    |         |                |                |         |
| Retrospective   | 24             |                  |         |         | 1.57 (1.13-2.18)   | 0.008   | 89.1%          | 211.61         | < 0.001 |
| Others          | 5              |                  |         |         | 1.45 (1.15-1.83)   | 0.001   | 16.8%          | 4.81           | 0.308   |

Note: CI, confidence interval; HR, hazard ratio; OR, odds ratio; RR, relative risk; ES, effect size.

**Figure S1** Flow diagram of study selection

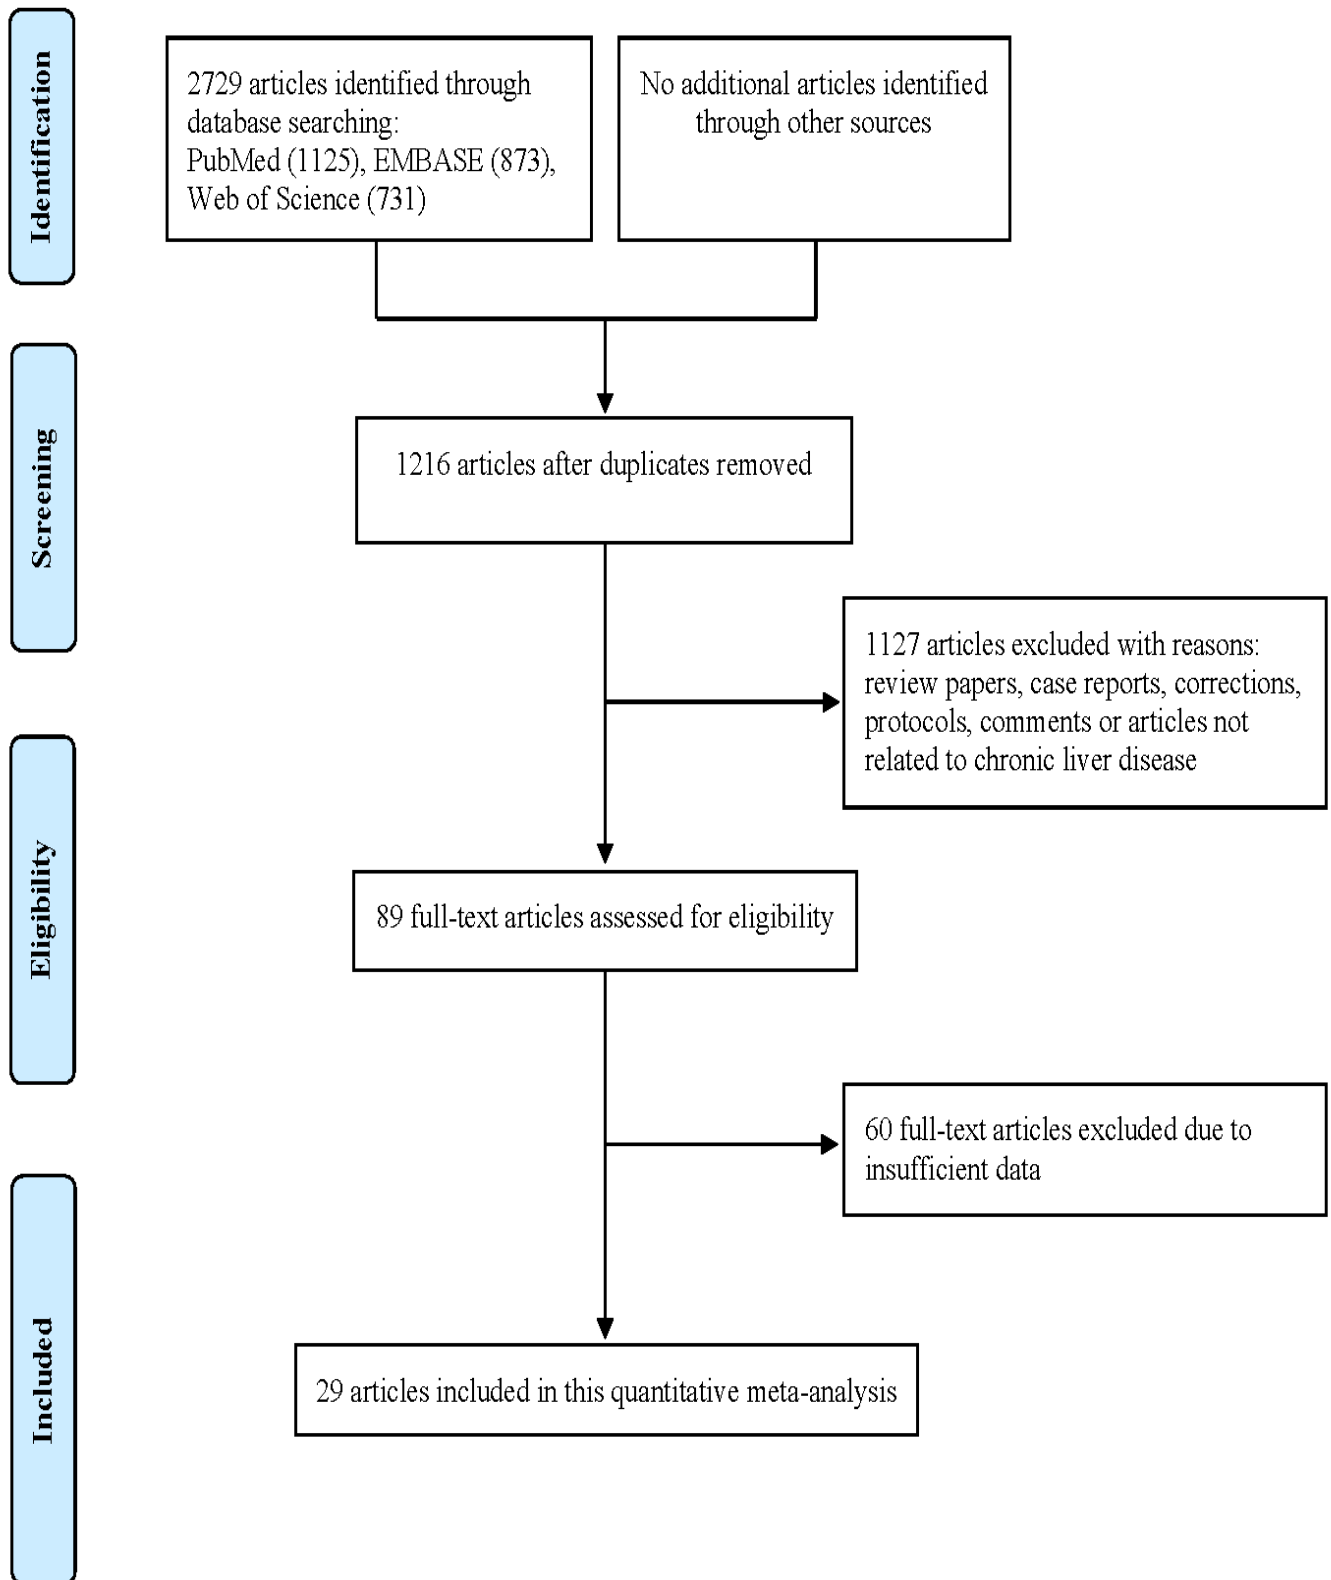

**Figure S2** The association between chronic liver disease and COVID-19 severity: Subgroup analysis by sample size. \* indicates combined value calculated from subgroups.

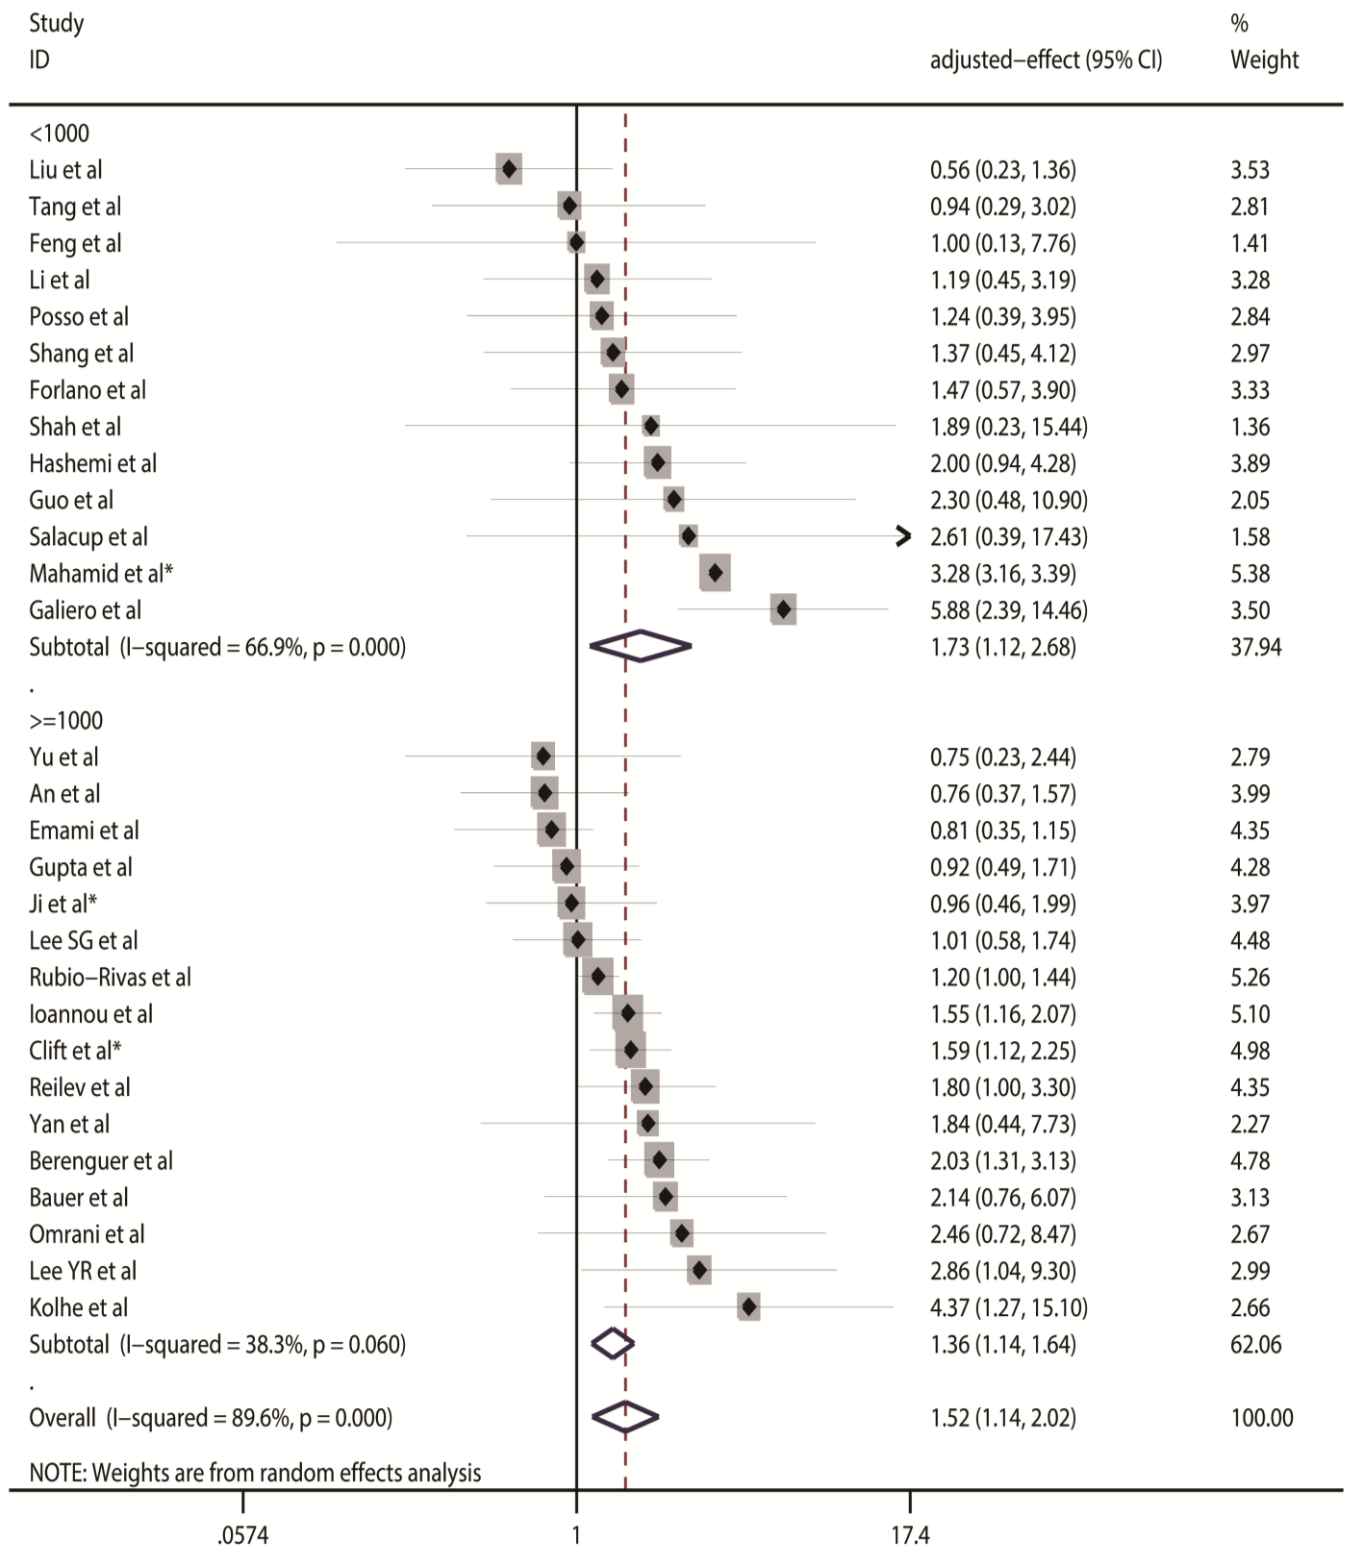

**Figure S3** The association between chronic liver disease and COVID-19 severity: Subgroup analysis by study design. \* indicates combined value calculated from subgroups.

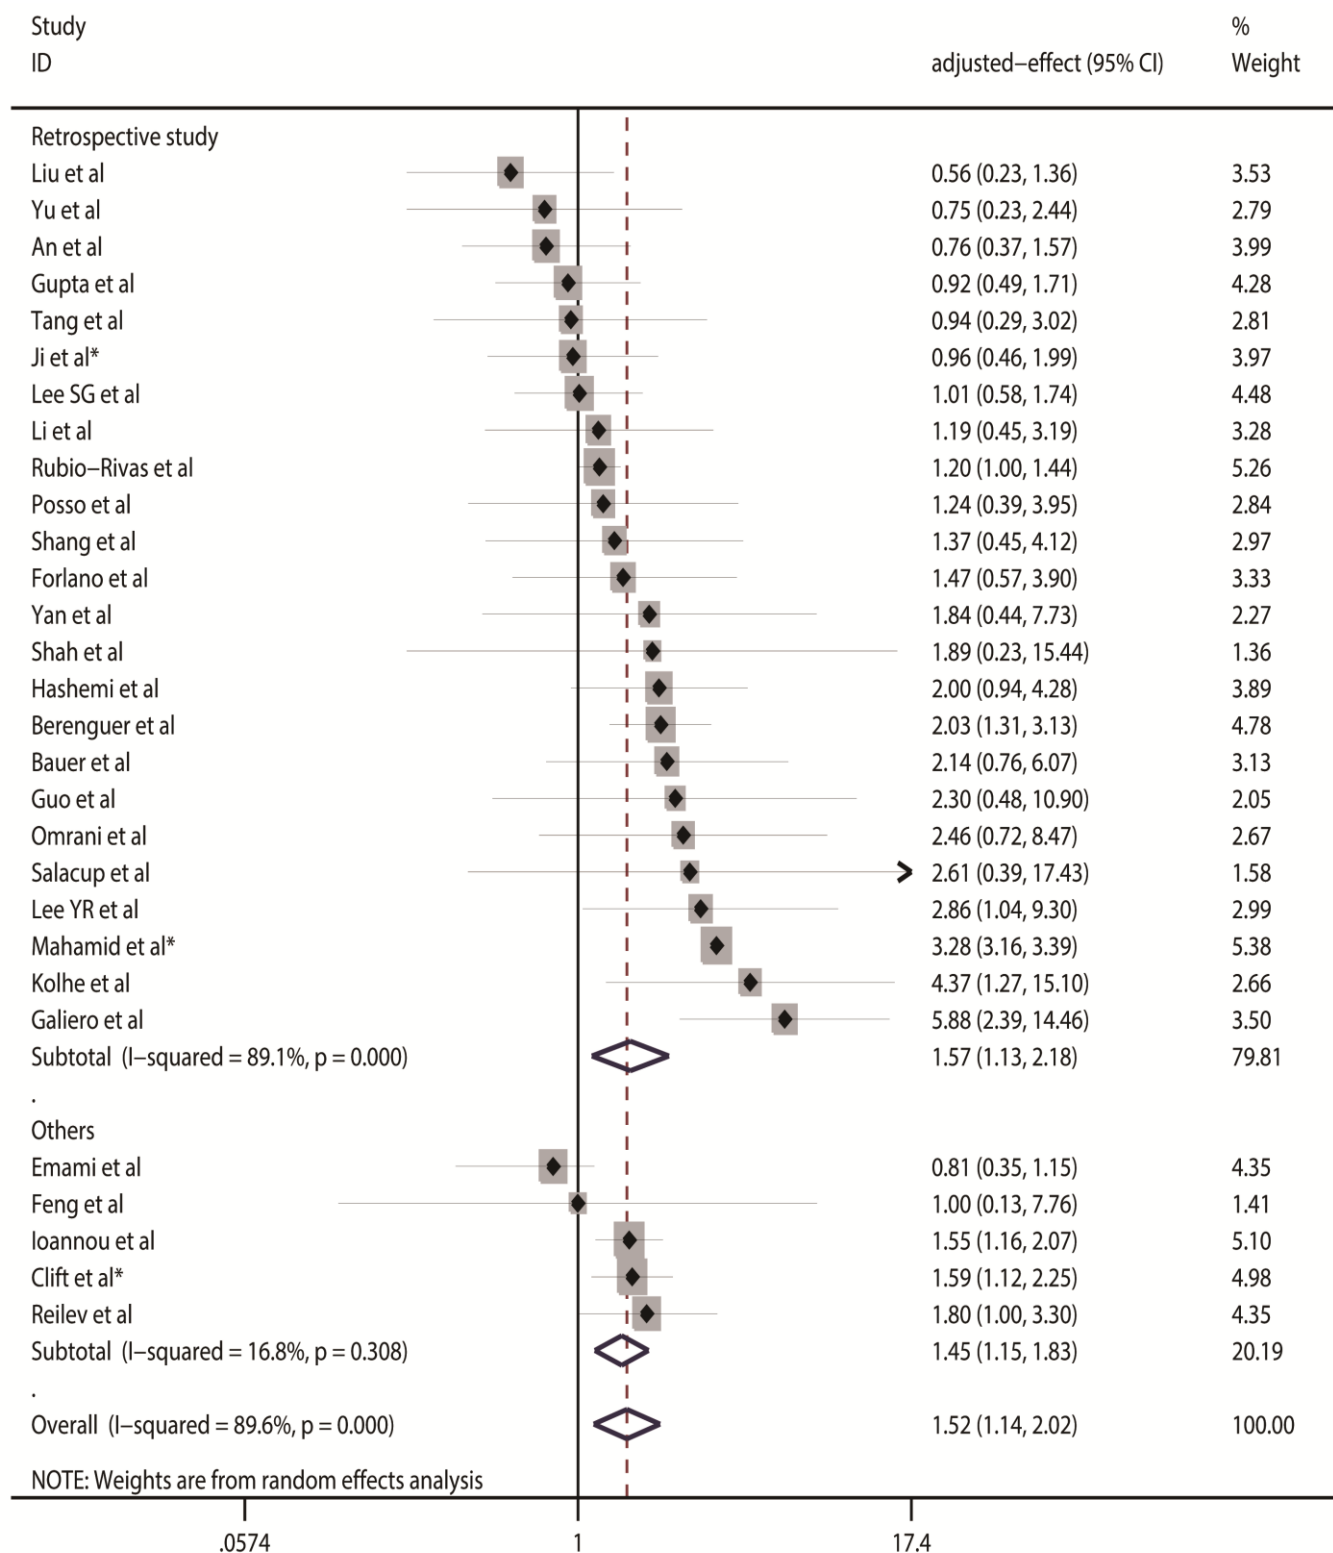

**Figure S4** The association between chronic liver disease and COVID-19 severity: Subgroup analysis by age.  
 \* indicates combined value calculated from subgroups.

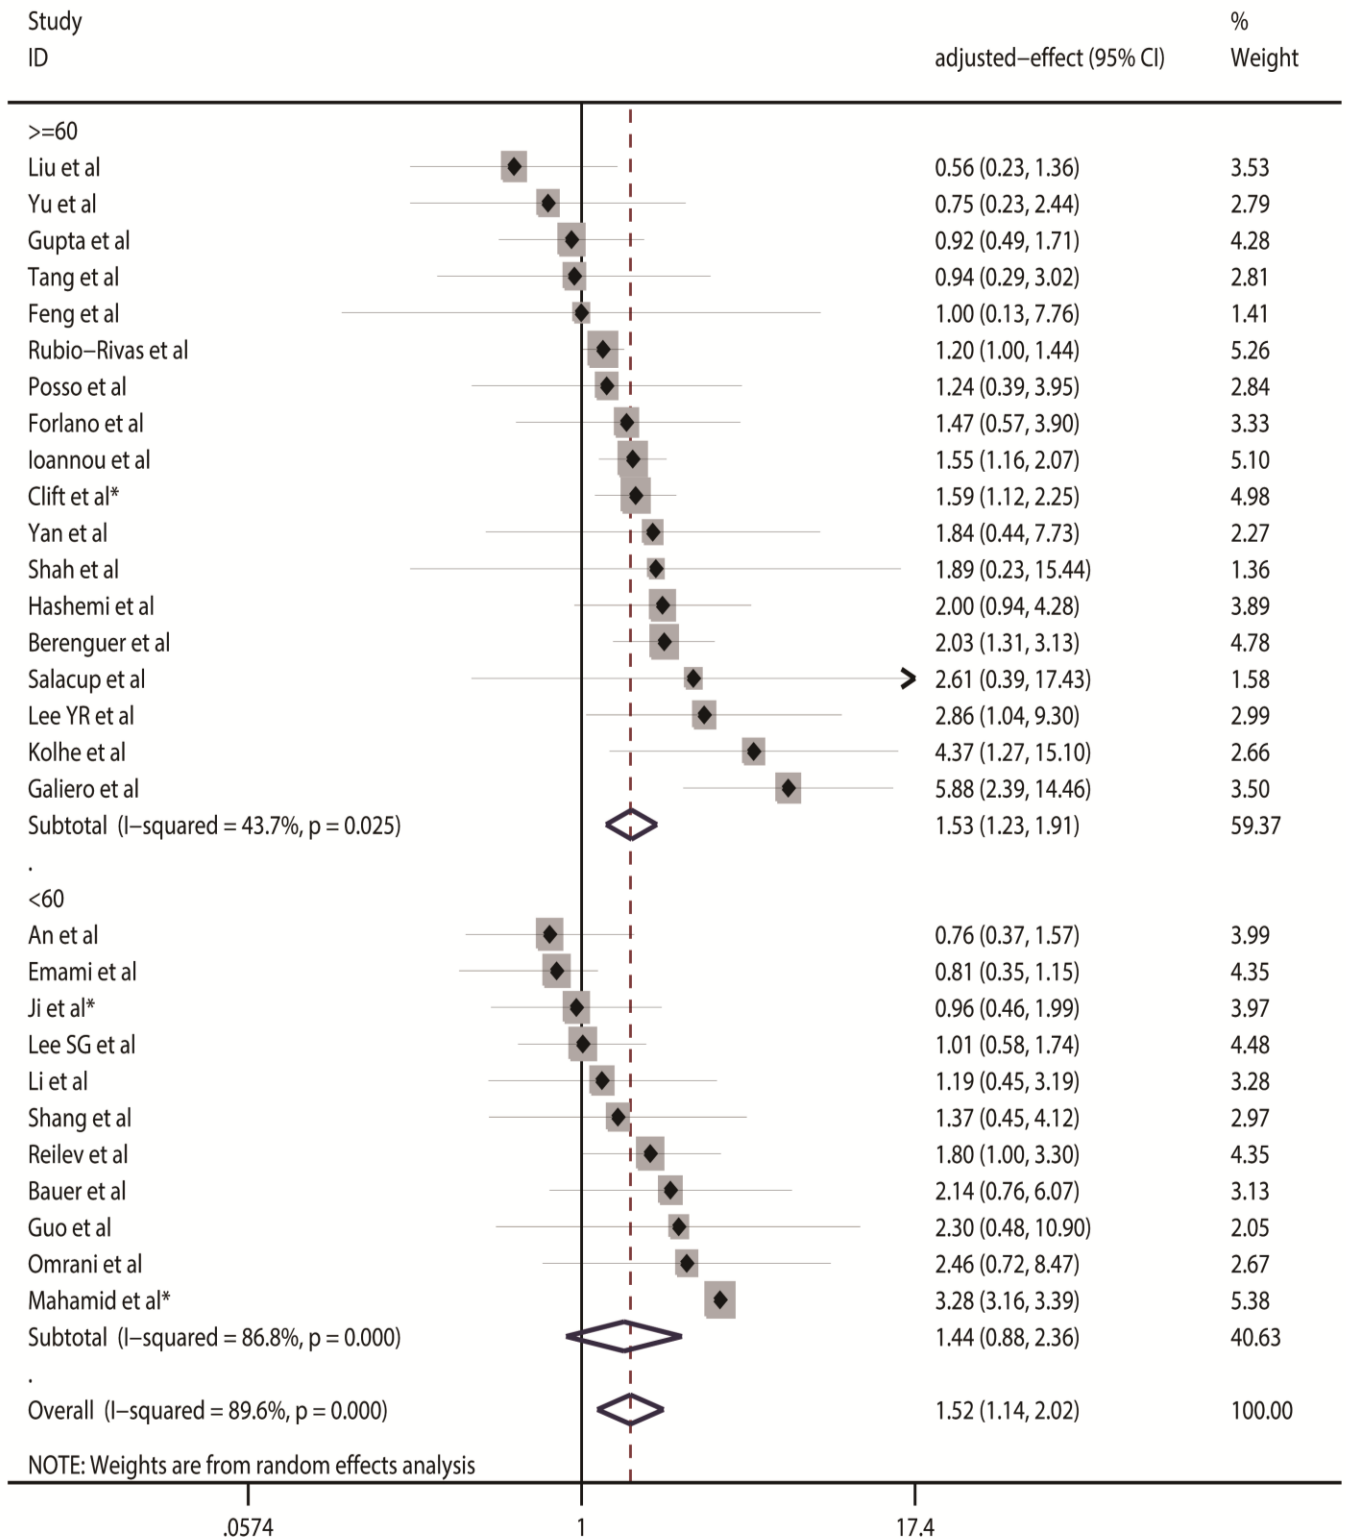

**Figure S5** The association between chronic liver disease and COVID-19 severity: Subgroup analysis by male percentage (%). \* indicates combined value calculated from subgroups.

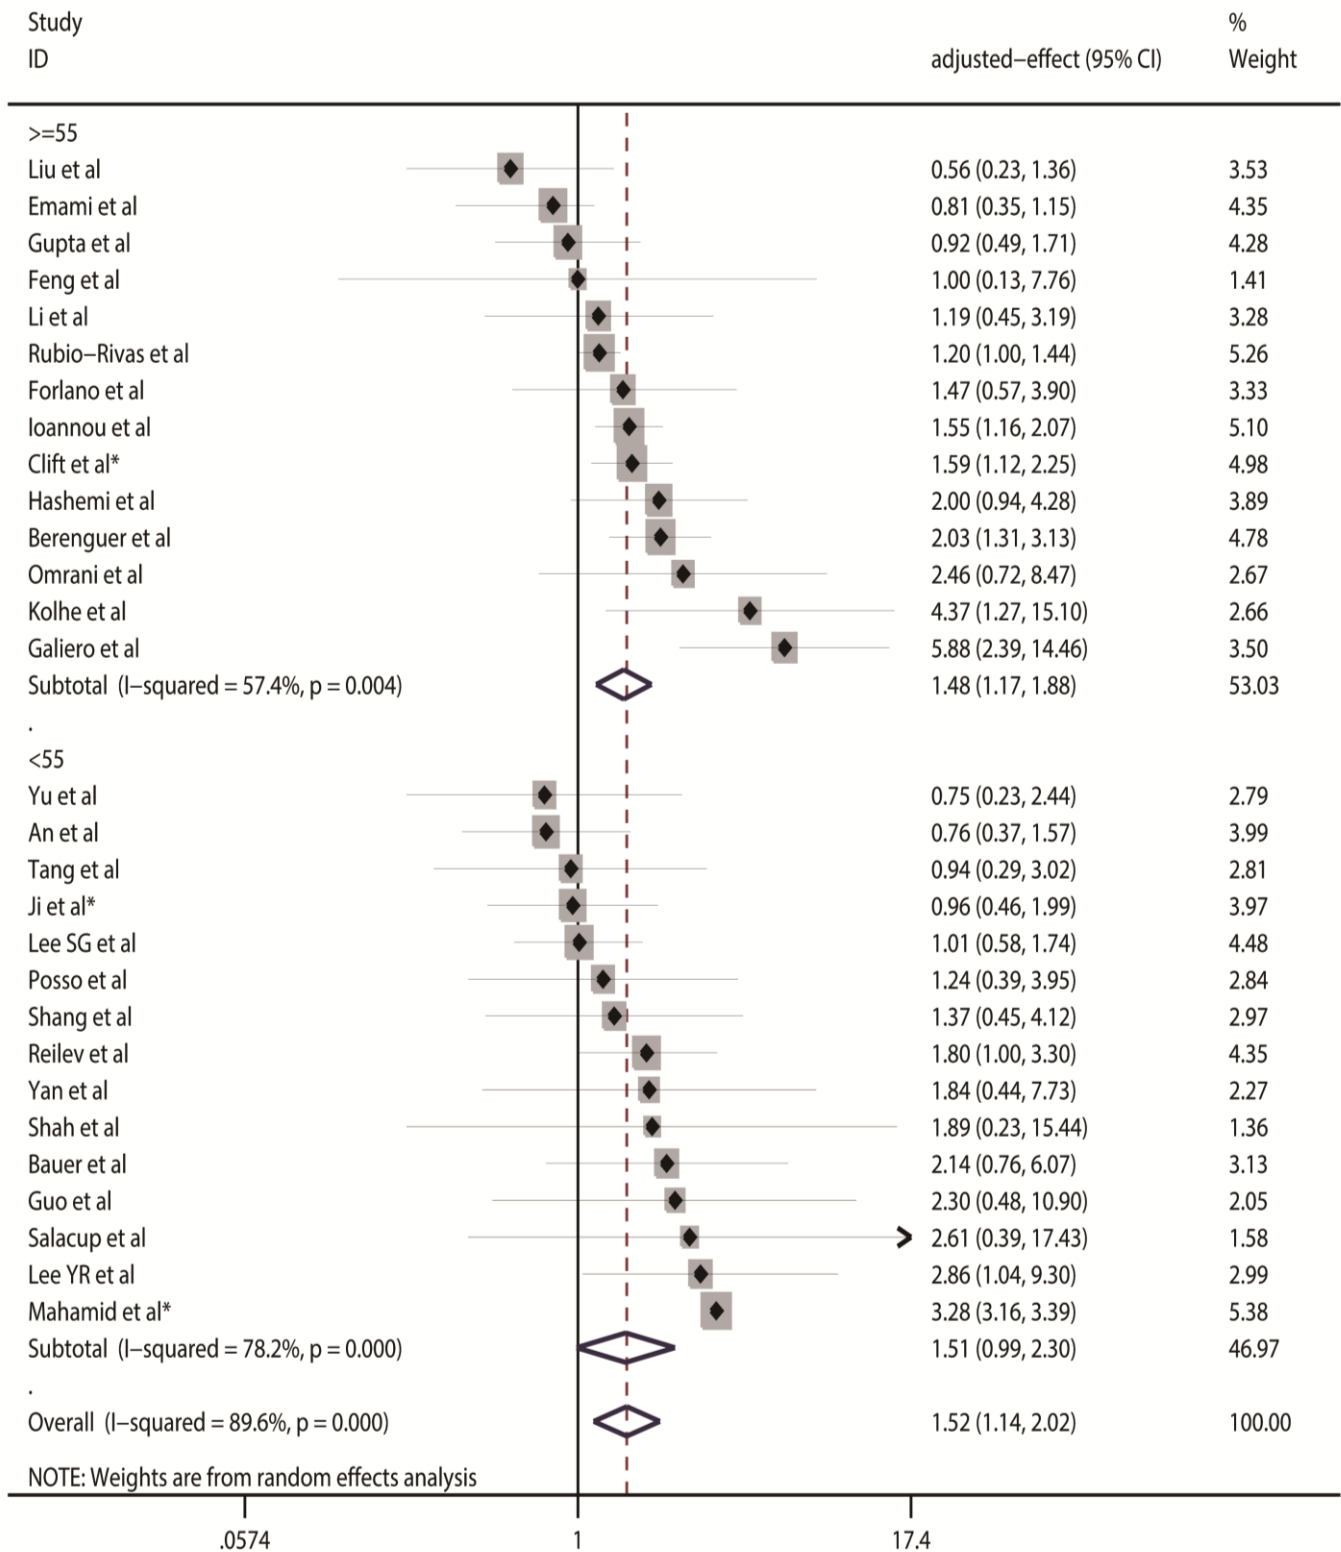

**Figure S6** The association between chronic liver disease and COVID-19 severity: Subgroup analysis by effect estimates. HR, hazard ratio; OR, odds ratio, RR, relative risk. \* indicates combined value calculated from subgroups.

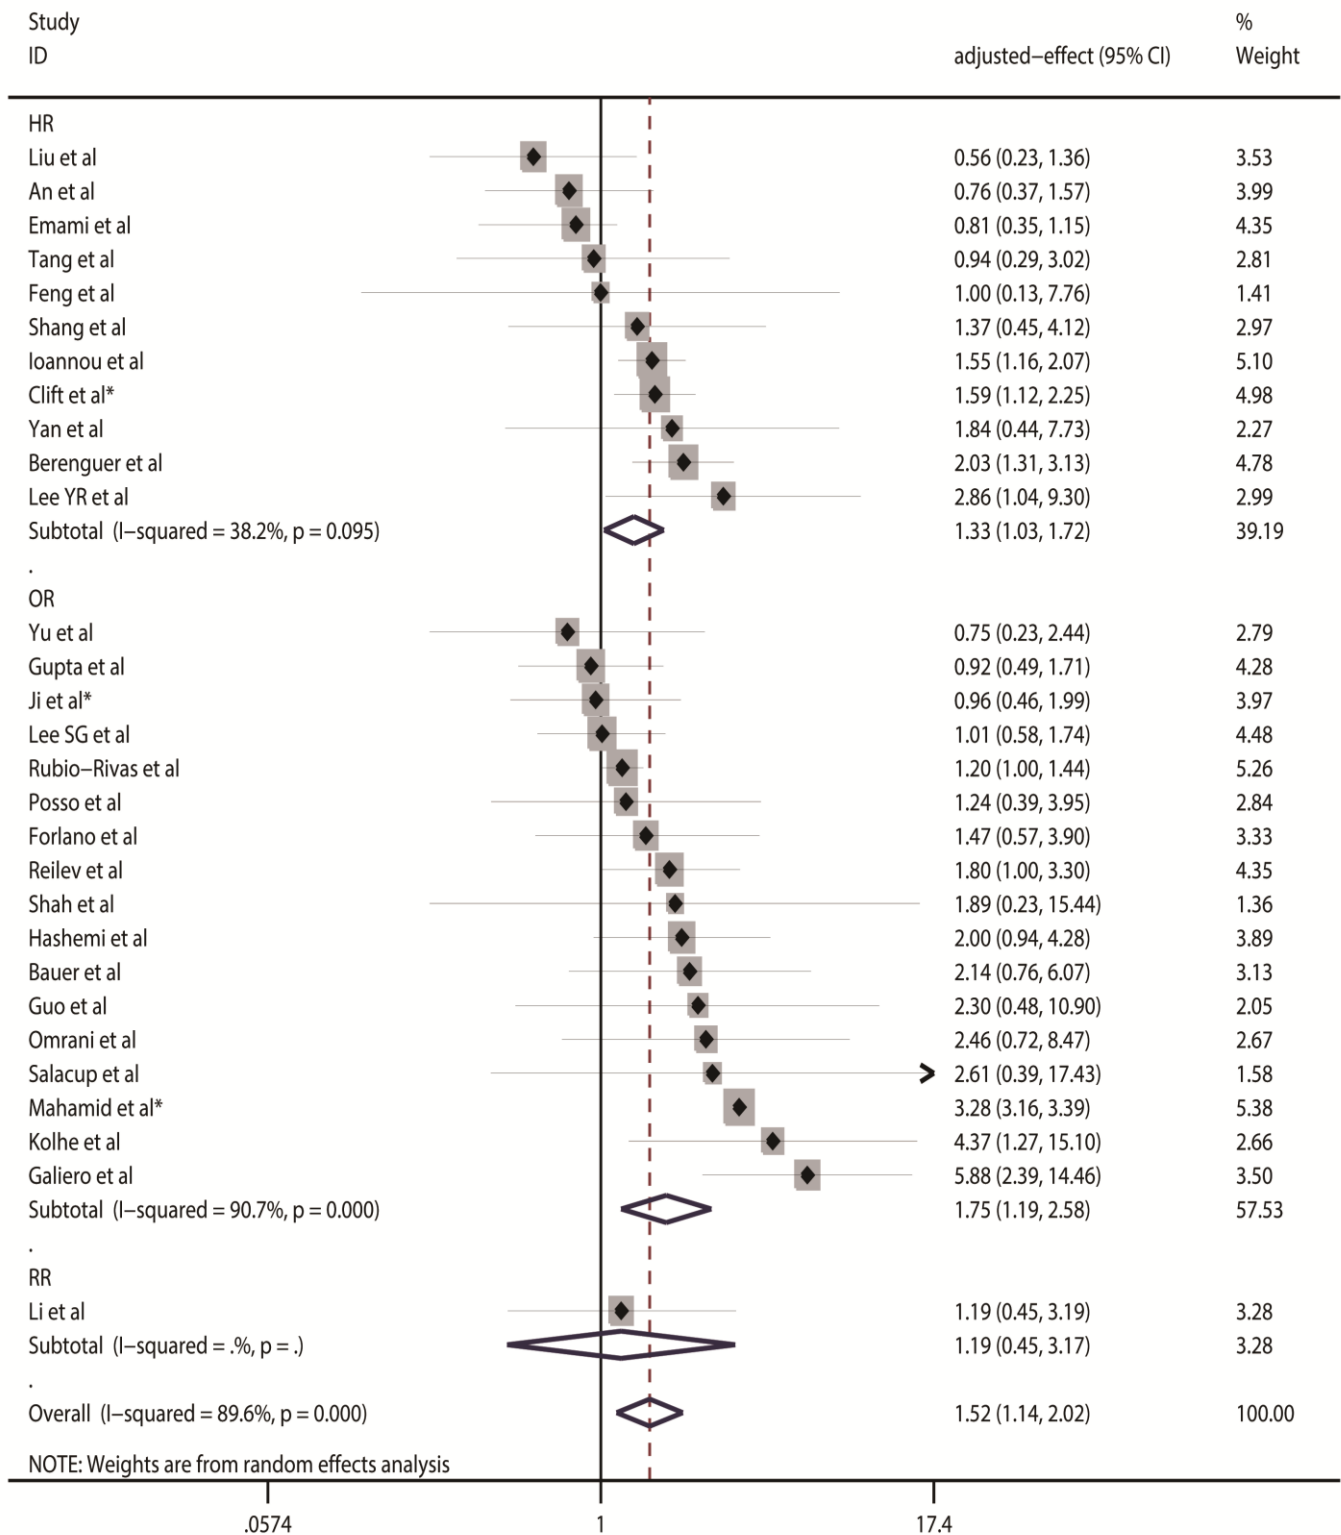



**Figure S7** The association between chronic liver disease and COVID-19 severity: Subgroup analysis by region. \* indicates combined value calculated from subgroups.

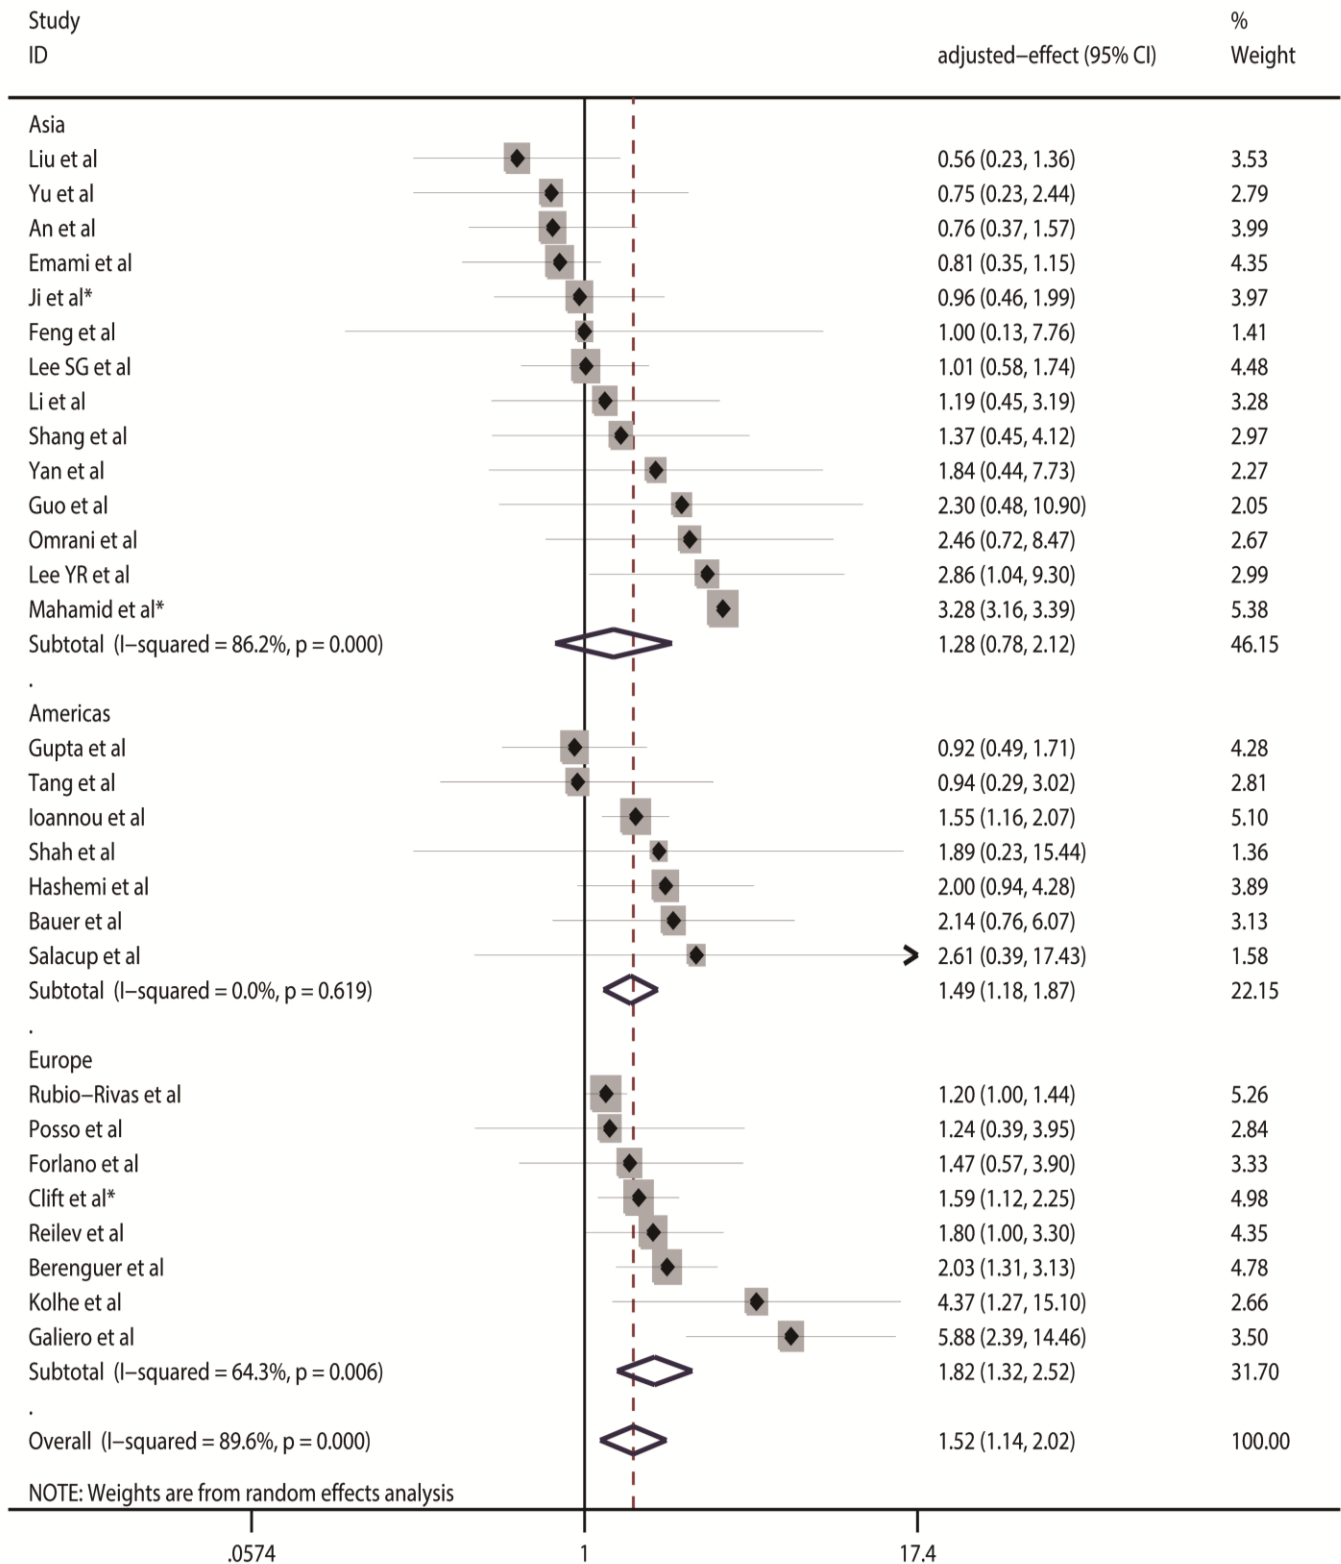

**Figure S8** Publication bias was assessed by Begg's test (A) and Egger's test (B).

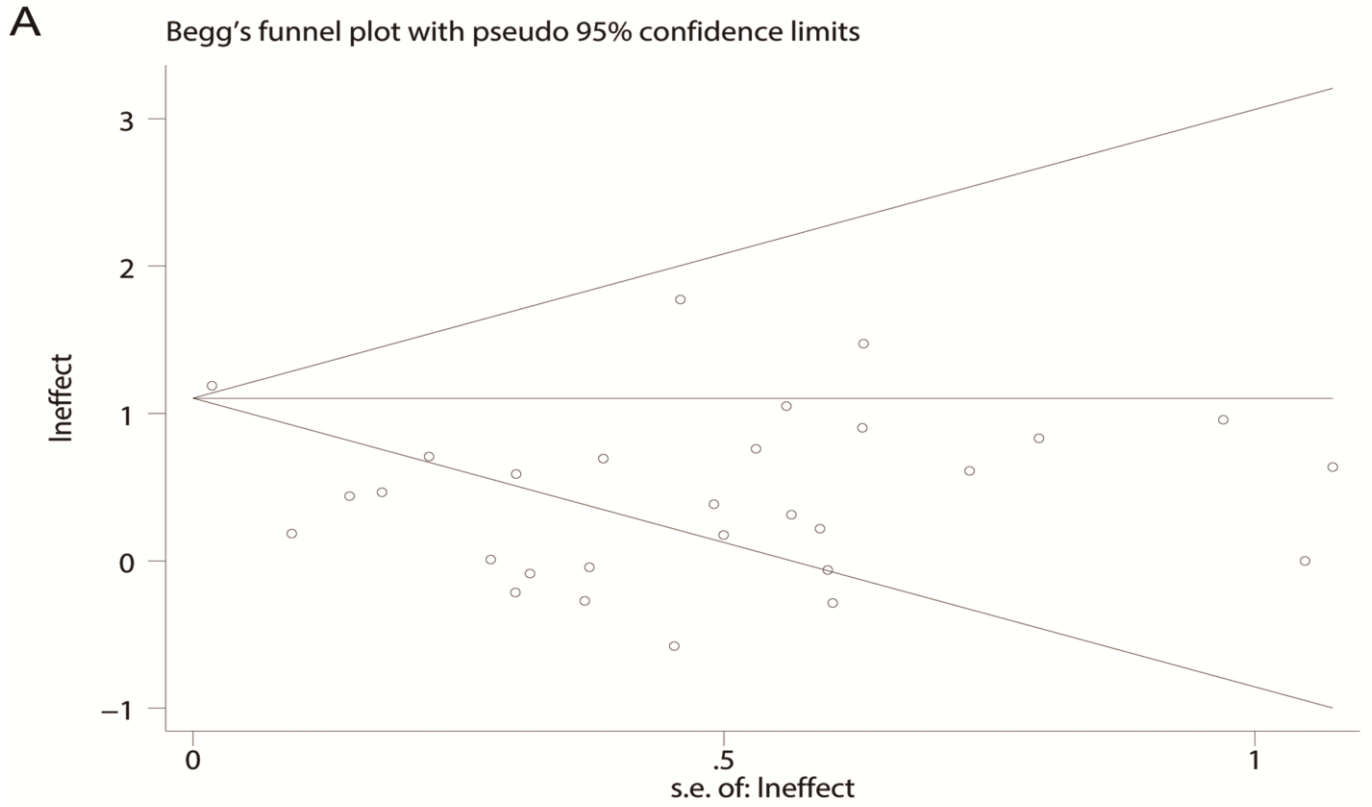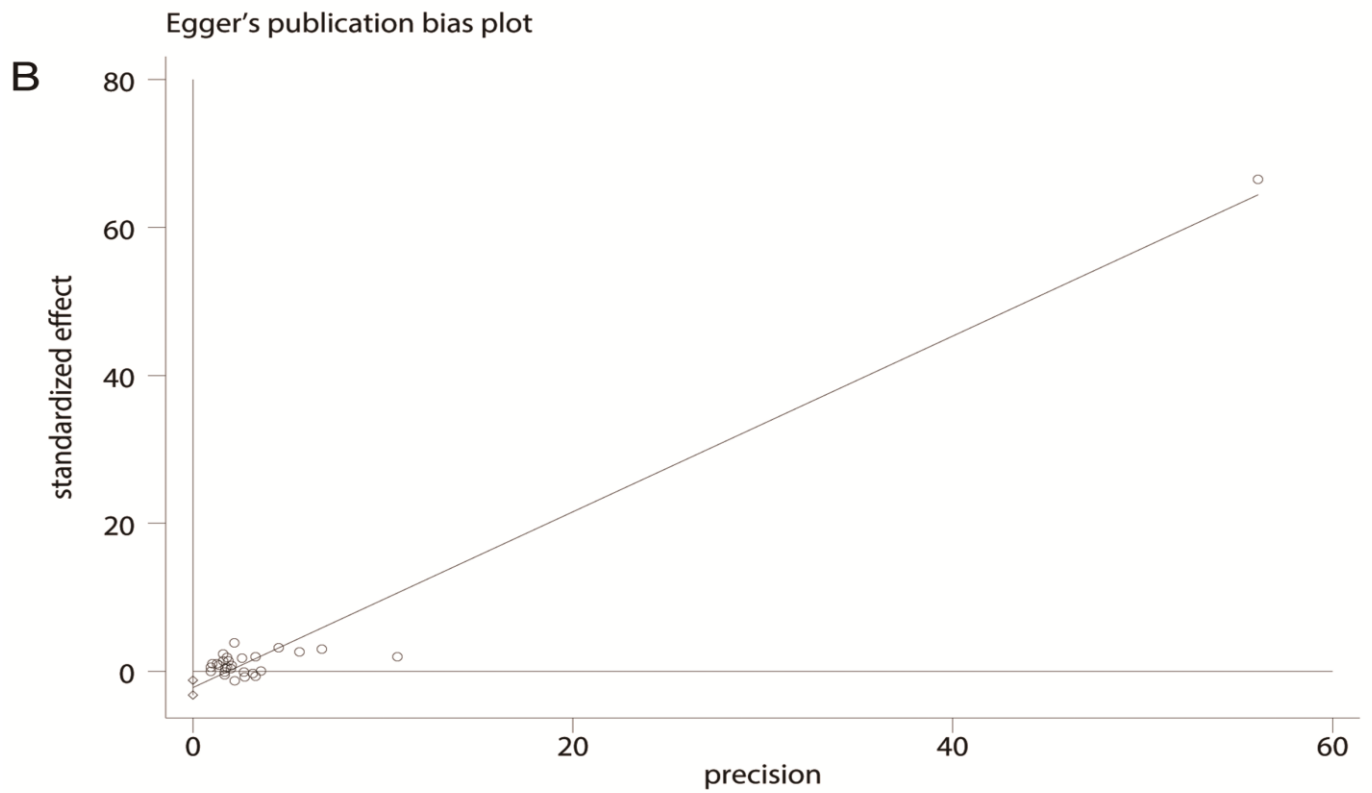

Supplement: 12072_2020_10133_MOESM1_ESM.pdf [file 12072_2020_10133_MOESM1_ESM.pdf]
